# Supplementary material
Source: MDPI journal article supplement (https://www.mdpi.com/2297-8739/11/1/6)
Supplement: s1 [file s1]

## **Supplementary Materials**

**Table S1.** OLS estimation for different rice varieties.

| Variables        | MA       | MB       | Tricin   | Caffeic acid | $\rho$ -Hydroxybenzoic acid | $\rho$ -Coumaric acid | Ferulic acid | Salicylic acid | Cinnamic acid |
|------------------|----------|----------|----------|--------------|-----------------------------|-----------------------|--------------|----------------|---------------|
| Milky Queen Var. | -16.09   | -2.901   | -218.4** | -79.37       | -78.38*                     | -53.59**              | -72.15       | -246.3         | -22.35        |
|                  | -9.732   | -8.534   | -88.5    | -54.18       | -42.3                       | -25.95                | -50.19       | -153.9         | -22.92        |
| Koshihikari Var. | 26.65*** | 19.94*** | 381.2*** | 252.3***     | 149.5***                    | 116.0***              | 161.2***     | 503.2***       | 59.13***      |
|                  | -6.882   | -6.035   | -62.58   | -38.31       | -29.91                      | -18.35                | -35.49       | -108.8         | -16.21        |
| Observations     | 48       | 48       | 48       | 48           | 48                          | 48                    | 48           | 48             | 48            |
| R-squared        | 0.056    | 0.003    | 0.117    | 0.045        | 0.069                       | 0.085                 | 0.043        | 0.053          | 0.02          |

\*, \*\*, and \*\*\* indicate significance at  $p < 0.05$ ,  $0.01$ , and  $0.001$ , respectively; MA: momilactone A; MB: momilactone B.

**Table S2.** OLS estimation for non-germinated and germinated samples.

| Variables      | MA       | MB       | Tricin   | Caffeic acid | $\rho$ -Hydroxybenzoic acid | $\rho$ -Coumaric acid | Ferulic acid | Salicylic acid | Cinnamic acid |
|----------------|----------|----------|----------|--------------|-----------------------------|-----------------------|--------------|----------------|---------------|
| Germinated     | 29.86*** | 31.17*** | 296.4*** | 187.3***     | 128.8***                    | 109.0***              | 171.8***     | 395.9***       | 72.46***      |
| Non-germinated | -8.997   | -7.204   | -83.42   | -48.06       | -39.53                      | -21.85                | -44.62       | -146.9         | -20.55        |
|                | 3.672    | 2.909    | 123.8**  | 119.0***     | 45.96                       | 34.74**               | 39.24        | 182.1*         | 11.72         |
|                | -6.362   | -5.094   | -58.99   | -33.98       | -27.95                      | -15.45                | -31.55       | -103.9         | -14.53        |
| Observations   | 48       | 48       | 48       | 48           | 48                          | 48                    | 48           | 48             | 48            |
| R-squared      | 0.193    | 0.289    | 0.215    | 0.248        | 0.188                       | 0.351                 | 0.244        | 0.136          | 0.213         |

\*, \*\*, and \*\*\* indicate significance at  $p < 0.05$ ,  $0.01$ , and  $0.001$ , respectively; MA: momilactone A; MB: momilactone B.

**Table S3.** OLS estimation for non-cooked and cooked samples.

| Variables    | MA      | MB       | Tricin   | Caffeic acid | $\rho$ -Hydroxybenzoic acid | $\rho$ -Coumaric acid | Ferulic acid | Salicylic acid | Cinnamic acid |
|--------------|---------|----------|----------|--------------|-----------------------------|-----------------------|--------------|----------------|---------------|
| Cooked       | 3.49    | -1.97    | 142.5    | 78.96        | 34.65                       | 7.674                 | 43.46        | 174.5          | 48.24**       |
|              | -10     | -8.54    | -91.8    | -54.19       | -43.55                      | -27.11                | -50.91       | -156           | -22.04        |
| Non-cooked   | 16.86** | 19.48*** | 200.8*** | 173.1***     | 93.03***                    | 85.42***              | 103.4***     | 292.8**        | 23.83         |
|              | -7.074  | -6.039   | -64.92   | -38.32       | -30.8                       | -19.17                | -36          | -110.3         | -15.58        |
| Observations | 48      | 48       | 48       | 48           | 48                          | 48                    | 48           | 48             | 48            |
| R-squared    | 0.003   | 0.001    | 0.05     | 0.044        | 0.014                       | 0.002                 | 0.016        | 0.026          | 0.094         |

\*, \*\*, and \*\*\* indicate significance at  $p < 0.05$ ,  $0.01$ , and  $0.001$ , respectively; MA: momilactone A; MB: momilactone B.

**Table S4.** OLS estimation for 80% ethanol and 80% methanol samples.

[illegible]

|           |       |       |       |       |       |       |       |       |       |
|-----------|-------|-------|-------|-------|-------|-------|-------|-------|-------|
| R-squared | 0.062 | 0.054 | 0.057 | 0.118 | 0.069 | 0.081 | 0.153 | 0.218 | 0.052 |
|-----------|-------|-------|-------|-------|-------|-------|-------|-------|-------|

\*, \*\*, and \*\*\* indicate significance at  $p < 0.05$ ,  $0.01$ , and  $0.001$ , respectively; MA: momilactone A; MB: momilactone B.

**Table S5.** OLS estimation for sonicated samples.

| Variables         | MA      | MB       | Tricin   | Caffeic acid | $\rho$ -Hydroxybenzoic acid | $\rho$ -Coumaric acid | Ferulic acid | Salicylic acid | Cinnamic acid |
|-------------------|---------|----------|----------|--------------|-----------------------------|-----------------------|--------------|----------------|---------------|
| Sonication (RT)   | -4.263  | -7.096   | 15.65    | -30.6        | -26.86                      | 2.616                 | 35.45        | 15.96          | 3.71          |
|                   | -12.84  | -11.09   | -113     | -73.77       | -51.94                      | -34.39                | -64.56       | -182.2         | -27.92        |
| Heat (80°C)       | 21.05** | 21.76*** | 242.0*** | 241.4***     | 111.1***                    | 89.71***              | 99.97**      | 299.4**        | 42.38**       |
|                   | -9.076  | -7.844   | -79.88   | -52.16       | -36.73                      | -24.32                | -45.65       | -128.8         | -19.74        |
| Observations      | 32      | 32       | 32       | 32           | 32                          | 32                    | 32           | 32             | 32            |
| R-squared         | 0.004   | 0.013    | 0.001    | 0.006        | 0.009                       | 0                     | 0.01         | 0              | 0.001         |
| Sonication (80°C) | -3.076  | -2.708   | 74.25    | -55.67       | 24.48                       | -3.991                | 40.11        | 226            | 13            |
|                   | -12.07  | -10.49   | -97.56   | -55.79       | -52.98                      | -30.24                | -51.28       | -181.2         | -26.45        |
| Heat (80°C)       | 21.05** | 21.76*** | 242.0*** | 241.4***     | 111.1***                    | 89.71***              | 99.97***     | 299.4**        | 42.38**       |
|                   | -8.538  | -7.42    | -68.99   | -39.45       | -37.47                      | -21.39                | -36.26       | -128.1         | -18.7         |
| Observations      | 32      | 32       | 32       | 32           | 32                          | 32                    | 32           | 32             | 32            |
| R-squared         | 0.002   | 0.002    | 0.019    | 0.032        | 0.007                       | 0.001                 | 0.02         | 0.049          | 0.008         |
| Sonication (80°C) | 1.187   | 4.388    | 58.6     | -25.06       | 51.34                       | -6.606                | 4.658        | 210.1          | 9.295         |
|                   | -12.24  | -9.966   | -134.6   | -73.28       | -56.25                      | -35.85                | -72          | -211.5         | -31.24        |
| Sonication (RT)   | 16.79*  | 14.67**  | 257.7**  | 210.8***     | 84.29**                     | 92.33***              | 135.4**      | 315.3**        | 46.09**       |
|                   | -8.652  | -7.047   | -95.16   | -51.81       | -39.77                      | -25.35                | -50.91       | -149.5         | -22.09        |
| Observations      | 32      | 32       | 32       | 32           | 32                          | 32                    | 32           | 32             | 32            |
| R-squared         | 0       | 0.006    | 0.006    | 0.004        | 0.027                       | 0.001                 | 0            | 0.032          | 0.003         |

\*, \*\*, and \*\*\* indicate significance at  $p < 0.05$ ,  $0.01$ , and  $0.001$ , respectively; MA: momilactone A; MB: momilactone B.
